# Supplementary material for: Genome sequence of pacific abalone (Haliotis discus hannai): the first draft genome in family Haliotidae
Source: PubMed Central journal article supplement (PMC5439488; doi:10.1093/gigascience/gix014), 2017-03-07
Supplement: gix014_GIGA-D-16-00149_Original_Submission.pdf [file gix014_GIGA-D-16-00149_Original_Submission.pdf]

1 **Genome sequence of pacific abalone (*Haliotis discus hannai*): the**  
2  
3  
4 **first draft genome in family Haliotidae.**  
5  
6  
7

8 **Bo-Hye Nam<sup>1†</sup>, Woori Kwak<sup>2,3†</sup>, Young-Ok Kim<sup>1</sup>, Dong-Gyun Kim<sup>1</sup>, Hee Jeong Kong<sup>1</sup>,**  
9  
10 **Woo-Jin Kim<sup>1</sup>, Jeong-Ha Kang<sup>1</sup>, Jung Youn Park<sup>1</sup>, Cheul Min An<sup>1</sup>, Ji-Young Moon<sup>1</sup>,**  
11  
12 **Choul Ji Park<sup>4</sup>, Jae Woong Yu<sup>3</sup>, Joon Yoon<sup>2</sup>, Minseok Seo<sup>3</sup>, Kwondo Kim<sup>2,3</sup>, Duk Kyung**  
13  
14 **Kim<sup>3</sup>, SaetByeol Lee<sup>3</sup>, Samsun Sung<sup>3</sup>, Chul Lee<sup>2,3</sup>, Younhee Shin<sup>5</sup>, Myunghee Jung<sup>5</sup>,**  
15  
16 **Byeong-Chul Kang<sup>5</sup>, Ga-hee Shin<sup>5</sup>, Sojeong Ka<sup>6</sup>, Kelsey Caetano-Anolles<sup>6</sup>, Seoae Cho<sup>3\*</sup>**  
17  
18 **and Heebal Kim<sup>7\*</sup>**  
19  
20  
21  
22  
23  
24  
25

26  
27 <sup>1</sup>Biotechnology Research Division, National Institute of Fisheries Science, Haean-ro 216,  
28 Gijang-eup, Gijang-gun, Busan 619-705, Korea; <sup>2</sup>Interdisciplinary Program in Bioinformatics,  
29 Seoul National University, Seoul 151-747, Republic of Korea; <sup>3</sup>C&K Genomics, Main Bldg.  
30 #514, SNU Research Park, Seoul 151-919, Republic of Korea; <sup>4</sup>Genetics and Breeding  
31 Research Center, National Institute of Fisheries Science, Geoje, Gyeongsangnam-do 656-842,  
32 Republic of Korea; <sup>5</sup>Research and Development Center, Insilicogen Inc., Yongin-si 16954,  
33 Gyeonggi-do, Republic of Korea; <sup>6</sup>Animal Science and Biotechnology, Seoul National  
34 University, Seoul 151-747, Republic of Korea; <sup>7</sup>Department of Agricultural Biotechnology  
35 and Research Institute for Agriculture and Life Sciences, Seoul National University, Seoul  
36 151-921, Republic of Korea  
37  
38  
39  
40  
41  
42  
43  
44  
45  
46  
47  
48  
49  
50

51  
52  
53  
54  
55 Bo-Hye Nam: [nambohye@korea.kr](mailto:nambohye@korea.kr); Woori Kwak : [asleo@cnkgenomics.com](mailto:asleo@cnkgenomics.com); Young-Ok  
56  
57 Kim : [yobest12@korea.kr](mailto:yobest12@korea.kr); Dong-Gyun Kim : [combikola@korea.kr](mailto:combikola@korea.kr); Hee Jeong Kong :  
58  
59 [heejkong@korea.kr](mailto:heejkong@korea.kr); Woo-Jin Kim : [wj2464@korea.kr](mailto:wj2464@korea.kr); Jeong-Ha Kang : [genetics@korea.kr](mailto:genetics@korea.kr);  
60  
61  
62  
63  
64  
65

1 Jung Youn Park : [genome@korea.kr](mailto:genome@korea.kr); Cheul Min An : [ancm@korea.kr](mailto:ancm@korea.kr); Ji-Young Moon:  
2  
3 [moonjy@nfrdi.go.kr](mailto:moonjy@nfrdi.go.kr); Cheol-Ji Park : [choulji@kore.kr](mailto:choulji@kore.kr); Jae Woong Yu :  
4  
5 [jwyu@cnkgenomics.com](mailto:jwyu@cnkgenomics.com); Joon Yoon : [joonyoon.jay@gmail.com](mailto:joonyoon.jay@gmail.com); Minseok Seo :  
6  
7 [nijorral@gmail.com](mailto:nijorral@gmail.com); Kwondo Kim : [bigkd@snu.ac.kr](mailto:bigkd@snu.ac.kr); Duk Kyung Kim : [kyung@cnkgenomics.com](mailto:duk-</a><br/>8<br/>9 <a href=); SaetByeol Lee : [sblee@cnkgenomics.com](mailto:sblee@cnkgenomics.com); Samsun Sung :  
10  
11 [triples@cnkgenomics.com](mailto:triples@cnkgenomics.com); Chul Lee : [swear0712@naver.com](mailto:swear0712@naver.com); Younhee Shin :  
12  
13 [yhshin@insilicogen.com](mailto:yhshin@insilicogen.com); Myunghee Jung : [mhjung@insilicogen.com](mailto:mhjung@insilicogen.com); Byeong-Chul Kang :  
14  
15 [bckang@insilicogen.com](mailto:bckang@insilicogen.com); Ga-hee Shin : [ghshin@insilicogen.com](mailto:ghshin@insilicogen.com); Sojeong Ka :  
16  
17 [skasnu@snu.ac.kr](mailto:skasnu@snu.ac.kr); Kelsey Caetano-Anolles : [kelseyca@gmail.com](mailto:kelseyca@gmail.com); Seoae Cho :  
18  
19 [seoae@cnkgenomics.com](mailto:seoae@cnkgenomics.com); Heebal Kim : [heebal@snu.ac.kr](mailto:heebal@snu.ac.kr)  
20  
21  
22  
23  
24  
25  
26  
27  
28

29 † These authors equally contributed and should be regarded as co-first authors.  
30  
31  
32  
33  
34

35 \* Corresponding authors  
36

37 Seoae Cho  
38  
39

40 C&K Genomics  
41  
42

43 Main Bldg. #423, SNU Research Park,  
44  
45

46 Seoul 151-919, Republic of Korea  
47  
48

49 Phone : +82-2-876-8820  
50  
51

52 Fax : +82-2-876-8827  
53  
54

55 E-mail: [seoae@cnkgenomics.com](mailto:seoae@cnkgenomics.com)  
56  
57  
58  
59  
60  
61  
62  
63  
64  
65

1 Heebal Kim  
2  
3

4 Research Institute of Agriculture and Life Sciences  
5  
6

7 Seoul National University, San 56-1, Sillim-dong, Gwanak-gu, Seoul 151-742, Korea  
8  
9

10 Phone : +82-2-880-4803  
11  
12

13 Fax : +82-2-883-8812  
14  
15

16 E-mail: [heebal@snu.ac.kr](mailto:heebal@snu.ac.kr)  
17  
18  
19  
20  
21  
22  
23  
24  
25  
26  
27  
28  
29  
30  
31  
32  
33  
34  
35  
36  
37  
38  
39  
40  
41  
42  
43  
44  
45  
46  
47  
48  
49  
50  
51  
52  
53  
54  
55  
56  
57  
58  
59  
60  
61  
62  
63  
64  
65

# Abstract

## Background

Abalones are large marine snails in the family Haliotidae and the genus Haliotis belonging to the class Gastropoda of the phylum Mollusca. The family Haliotidae contains only one genus, Haliotis, and this single genus is known to contain several species of abalone. With 18 additional subspecies, the most comprehensive treatment of Haliotidae considers 56 species valid[1]. Abalone is an economically important fishery and aquaculture animal which is considered a highly-prized seafood delicacy. The total global supply of abalone has increased fivefold since 1970's. In order to prevent indiscreetly fishing abalones, legal landings from abalone fisheries have made fishery productions decreased gradually from 19,720 mt to 7,486 mt, but have made farm productions increase explosively from 50 mt to 103,464 mt in the past forty years [2]. Additionally, researchers have recently focused on Abalone given their reported tumor suppression effect [3-5]. However, despite the valuable features of this marine animal, no genomic information is available for Haliotidae family and related research is still limited.

## Findings

In order to construct the *H.discus hannai* genome, a total of 580G base pairs using Illumina and Pacbio platforms were generated with 322-fold coverage based on the 1.8Gb estimated genome size of *H.discus hannai* using flow cytometry. The final genome assembly consisted of 1.86Gb with 35,450 scaffolds (>2kb). GC content level was 40.51%, and the N50 length of assembled scaffolds was 211kb. We identified 29,449 genes using Evidence Modeler based on the gene information from ab initio prediction, protein homology with known genes and transcriptome evidence of RNA-seq.

1 **Conclusions**

2  
3  
4 Here we present the first Haliotidae genome, *Haliotis discus hannai*, with sequencing data,  
5  
6 assembly, and gene annotation information. This will be helpful for resolving the lack of  
7  
8 genomic information in the Haliotidae family as well as providing more opportunities for  
9  
10 understanding gastropod evolution.  
11  
12

13 **Keywords**

14  
15 Abalone genome, Halotidae, *Haliotis discus hannai*  
16  
17  
18  
19  
20  
21  
22  
23  
24  
25  
26  
27  
28  
29  
30  
31  
32  
33  
34  
35  
36  
37  
38  
39  
40  
41  
42  
43  
44  
45  
46  
47  
48  
49  
50  
51  
52  
53  
54  
55  
56  
57  
58  
59  
60  
61  
62  
63  
64  
65

## Data description

Abalone is one of the most important marine gastropod molluscs that inhabits various coastal regions of the world. It is well known that abalone habitation impacts algal communications connected with the reef ecosystem, so they are often utilized for ecological research[6]. Among many abalone species, *H.discus hannai* is a widely used ingredient in East Asian cuisine. It is a valuable food resource due to its richness in protein and other nutrients[7, 8] and it is considered as an important fishery and aquaculture animal. Additionally, researchers have recently focused on *H.discus hannai* given their reported tumor suppression effect [3-5]. However, despite the valuable features of this marine animal, no genomic information is available. Therefore, the first draft genome in family Haliotidae has the potential to be utilized as a valuable resource for many researchers.

A single *Haliotis discus hannai* abalone was collected from the brood stock at the Genetic and Breeding Research Center (GBRC) of the National Fisheries Research & Development Institute (NFRDI) on Geoje Island, Korea for sampling. Hemolymph(10ml) was withdrawn from the sole side foot muscle using a syringe. For genomic DNA extraction, hemocytes were harvested from fresh hemolymph by centrifugation at  $3000 \times \text{rpm}$  for 5 min at  $4^{\circ}\text{C}$ . Genomic DNA was extracted using a DNeasy Animal Mini Kit (Qiagen, Hilden, Germany). A total 39.38 ug of DNA was quantified using the standard procedure of Quant-iT PicoGreen dsDNA Assay Kit (Molecular Probes, Eugene, OR, USA) with Synergy HTX Multi-Mode Reader (Biotek, Winooski, VT, USA). Quality of DNA was also checked using ND-1000 spectrophotometer (Thermo Scientific, Wilmington, DE, USA).

For whole genome shotgun sequencing and draft genome assembly, we used multiple sequencing platforms (Illumina Hiseq2000, Nextseq500 and Pacbio RS II) with 7 different

1 24 libraries. First, two paired-end libraries with insert sizes of 250bp and 350bp were  
2  
3 25 constructed using Illumina TruSeq DNA Sample Prep. Kit (Illumina, San Diego, CA). Mate  
4  
5  
6 26 pair libraries with insert sizes of about 3k, 5k, 8k, and 10k were constructed for scaffolding  
7  
8 27 process using Illumina Nextera mate-pair library construction protocol (Illumina, San Diego,  
9  
10 28 CA). For high-quality genome assembly, long mate pair library with insert size over 40kb is  
11  
12  
13 29 essential. We tried to construct a long mate pair library using 40kb fosmid clone. However,  
14  
15  
16 30 efficiency of fosmid library construction was very low and we could not retain enough  
17  
18 31 amount of clone. Therefore, Pacbio system was employed for final scaffolding process using  
19  
20 32 long read. Pacbio long reads were generated using P6-C4 chemistry of Pacbio RS II system.  
21  
22  
23 33 Detailed information about the constructed library and generated sequencing data is provided  
24  
25 34 in Table 1. Quality control process of generated raw data was conducted for downstream  
26  
27  
28 35 analysis. Quality of raw data was checked using FASTQC[9] and adapter sequences were  
29  
30  
31 36 removed via Trimmomatic[10], for paired-end libraries, and Nxttrim[11], for mate-pair  
32  
33 37 libraries. K-mer frequency analysis of the abalone genome was conducted using a paired-end  
34  
35 38 library with 350bp insert-size and the jellyfish[12] command-line program. The K-mer  
36  
37  
38 39 distribution of the paired-end library provides valuable information about the target genome.  
39  
40 40 As a result, 19-mer distribution of *Haliotis discus hannai* genome was generated (Figure 1).  
41  
42 41 Genome size estimation based on the 19-mer distribution was conducted through “Estimate  
43  
44 42 genome size.pl” code  
45  
46 43 ([https://github.com/josephryan/estimate\\_genome\\_size.pl/wiki/Estimate-genome-size.pl](https://github.com/josephryan/estimate_genome_size.pl/wiki/Estimate-genome-size.pl)). The  
47  
48 44 estimated genome size of *H.discus hannai* using 19-mer distribution was about 1.65Gb.  
49  
50 45 Based on the 19-mer distribution of paired-end reads, there was a second peak located in the  
51  
52 46 half x-axis of the main peak. This result indicates that *H.discus hannai* genome had high  
53  
54  
55 47 heterozygous genetic character and probable DNA contamination from other organisms.  
56  
57  
58 48 Before genome assembly, raw reads from Hiseq2000, Nextseq500 paired-end and mate pairs  
59  
60  
61  
62  
63  
64  
65

1 49 were pre-processed by bacterial sequences, duplicates, and ambiguous nucleotides. The  
2  
3 50 resulting high-quality sequences were used in subsequent assembly. Error correction and  
4  
5 51 initial contig assembly was conducted using *clc\_assembler* within the CLC Assembly Cell  
6  
7  
8 52 (<http://www.clcbio.com/products/clc-assembly-cell/>) software pipeline. Scaffolds were then  
9  
10  
11 53 built using the mate-pairs and Pacbio RS II reads sequentially by SSPACE[13] and  
12  
13 54 PBJelly2[14]. After scaffolding, Gapcloser[15] was employed to close the gaps within  
14  
15 55 each scaffold with -l 155 and -p 31, iteratively. Summary statistics for final assembly is  
16  
17  
18 56 provided in Table 2.

19  
20  
21 57 Before conducting gene prediction using the assembled sequence, repeat elements were  
22  
23 58 identified using RepeatMasker[16] with Repbase[17]. RepeatModeler, which includes  
24  
25 59 RECON[18], RepeatScout[19] and TRF[20], was used to create a custom database of  
26  
27  
28 60 *H. discus hannai*. After custom library construction, RepeatMasker with RMBlast was used  
29  
30  
31 61 for each genome with 'no\_is' option, using repeat libraries from RepeatModeler and Repbase.  
32  
33 62 Identified mobile elements are summarized in Table 3.

34  
35  
36 63 Genes were predicted through three different algorithms: *ab initio*, RNA-seq transcript based,  
37  
38 64 and protein homology-based. For RNA-seq transcript based prediction, transcriptome data  
39  
40  
41 65 from six organ tissues (Table 4) were aligned to the assembled genome sequence using  
42  
43 66 Tophat[21], and transcript structure was predicted through Cufflinks[22]. The homology-  
44  
45  
46 67 based method employs complete protein sequences from diverse taxonomical genomes,  
47  
48  
49 68 which is fit to our model. For *Haliothis discus hannai*, the following 8 species were utilized:  
50  
51 69 *Lottia gigantea*, *Crssostrea gigas*, *Aplysia californica*, *Strongylocentrtus purpuratus*,  
52  
53  
54 70 *Branchiostoma floridae*, *Danio rerio*, *Oncorhynchus mykiss* and *Homo sapiens*. Those  
55  
56 71 protein sequences were aligned to the *Haliothis discus hannai* genome using TBASTN (E-  
57  
58  
59 72 value  $\leq 1E-4$ )[23]. Next, the homologous genome sequences were aligned to the matched  
60  
61  
62  
63  
64  
65



1 73 proteins using Exonerate[24] to predict the accurate spliced alignments. Table 5 summarizes  
2  
3 74 the alignment results of known proteins in various species. For *ab initio* gene prediction,  
4  
5 75 Augustus[25] was trained using RNA-seq data and known proteins by using the complete  
6  
7  
8 76 transcriptome as training matrix for HMM. Fgenesh[26] and Geneid[27] were also used. The  
9  
10 77 parameters used and the number of predicted genes is provided in Table 6. Gene prediction  
11  
12  
13 78 data from each method was combined using EVM (Evidence Modeler)[28] to build a  
14  
15 79 consensus gene set for the abalone genome. All gene models were converted to EVM  
16  
17  
18 80 compatible GFF3 format and merged to a consensus gene set. After consensus gene  
19  
20 81 annotation was generated from EVM, manual curation was conducted for abandon genes  
21  
22  
23 82 from EVM to build a final consensus gene set of *H.discus hannai*. A total of 29,449 genes  
24  
25 83 were predicted in the *H.discus hannai* genome and summary statistics for the consensus gene  
26  
27  
28 84 set is provided in Table 7. To evaluate the quality of *H.discus hannai* draft genome, we  
29  
30 85 conducted paired-end read remapping and BUSCO (Benchmarking Universal Single-Copy  
31  
32  
33 86 Orthologs) analysis. 94.89% of paired-end reads with 350bp insert size were successfully  
34  
35 87 mapped to the assembled genome and assembled genome contains 609 complete and 130  
36  
37  
38 88 fragmented genes in BUSCO analysis. The detailed information of BUSCO analysis is  
39  
40 89 summarized in Table 8.

41  
42  
43 90  
44  
45  
46 91 In summary, here we report the first annotated Haliotidae genome of *H.discus hannai* based  
47  
48  
49 92 on various genetic evidence. We expect that the *H.discus hannai* genome presented here,  
50  
51 93 which is the first genome to be sequenced in the family Haliotidae, will provide useful  
52  
53  
54 94 genomic information for many researchers. *Haliotis discus hannai* is a cold-water abalone  
55  
56 95 breed that have difficulties dealing with the change in their inhabitable latitude, which is due  
57  
58  
59 96 to global warming and the resulting increase in the rate of sudden perishing. Genomic  
60  
61  
62  
63  
64  
65

1 97 information of abalone is essential information which can be used for genetic breeding to  
2  
3 98 improve productivity and genetic engineering for the heat resistance breed. It can also  
4  
5  
6 99 provide valuable information for future genomic studies because only limited genome  
7  
8 100 information about marine animals and mollusks is currently available. Abalone has the  
9  
10  
11 101 biggest genome size among known gastropod with various and specific phenotype features.  
12  
13 102 Evolutionary signatures recorded in abalone genome can be identified through future  
14  
15 103 comparative genomic studies and we expect our result will provide more insight into  
16  
17  
18 104 Haliotidae and marine mollusk evolution.  
19  
20  
21  
22  
23  
24  
25  
26  
27  
28  
29  
30  
31  
32  
33  
34  
35  
36  
37  
38  
39  
40  
41  
42  
43  
44  
45  
46  
47  
48  
49  
50  
51  
52  
53  
54  
55  
56  
57  
58  
59  
60  
61  
62  
63  
64  
65

1 **105 Availability of supporting data**

2  
3  
4  
5 106 Raw data is available in project accession PRJNA317403 of NCBI database.  
6  
7

8 107  
9

10  
11 **108 List of abbreviations**

12  
13  
14  
15 109 GBRC - Genetic and Breeding Research Center  
16  
17

18 110 NFRDI - National Fisheries Research & Development Institute  
19  
20

21 111 EVM - Evidence Modeler  
22  
23

24 112 BUSCO - Benchmarking Universal Single-Copy Orthologs  
25  
26  
27

28 **113 Competing interests**

29  
30  
31 114 All authors report no competing interests.  
32  
33  
34

35 **115 Authors contributions**

36  
37 116 Sampling - Bo-Hye Nam, Young-Ok Kim, Dong-Gyun Kim  
38  
39  
40

41 117 Sequencing - Bo-Hye Nam, Hee Jeong Kong, Woo-Jin Kim, Jeong-Ha Kang, Ji-Young Moon,  
42  
43

44 118 Choul Ji Park, Duk Kyung Kim  
45  
46

47 119 Genome assembly - Bo-Hye Nam, Woori Kwak, Jae Woong Yu, Joon Yoon, SaetByeol Lee,  
48  
49

50 120 Samsun Sung, Chul Lee, Sojeong Ka, Kelsey Caetano-Anolles  
51  
52

53 121 Repeat element analysis - Woori Kwak, Minseok Seo, Kwondo Kim  
54  
55  
56

57 122 Gene prediction - Woori Kwak, Younhee Shin, Myunghee Jung, Byeong-Chul Kang, Ga-hee  
58

59 123 Shin  
60  
61  
62  
63  
64  
65

1 124 Funding and experimental design – Jung Youn Park, Cheul Min An, Seoae Cho, Heebal Kim

2

3

4

5 125

6

7

8 126 **Acknowledgements**

9

10 127 This work was supported by a grant from the National Institute of Fisheries Science

11

12

13 128 (R2016024).

14

15

16

17

18

19

20

21

22

23

24

25

26

27

28

29

30

31

32

33

34

35

36

37

38

39

40

41

42

43

44

45

46

47

48

49

50

51

52

53

54

55

56

57

58

59

60

61

62

63

64

65

## References

1. Appeltans, W., et al., *World register of marine species*. Accessed online: <http://www.marinespecies.org> (accessed on 28 February 2014), 2012.
2. Cook, P.A., *The worldwide abalone industry*. Modern Economy, 2014. **5**(13): p. 1181.
3. Lim, S.Y., *Cytotoxic and Antioxidant Activities of Abalone (*Haliotis discus hannai*) Extracts*. Journal of Life Science, 2014. **24**(7): p. 737-742.
4. Suleria, H.R., et al., *Therapeutic Potential of Abalone and Status of Bioactive Molecules: A Comprehensive Review*. Critical reviews in food science and nutrition, 2015(just-accepted): p. 00-00.
5. Lee, C.-G., et al., *Abalone visceral extract inhibit tumor growth and metastasis by modulating Cox-2 levels and CD8+ T cell activity*. BMC complementary and alternative medicine, 2010. **10**(1): p. 1.
6. Hamer, P.A. and F. Victoria, *Understanding the ecological role of abalone in the reef ecosystem of Victoria*. 2010: Fisheries Victoria.
7. Elliott, N.G., *Genetic improvement programmes in abalone: what is the future?* Aquaculture Research, 2000. **31**(1): p. 51-59.
8. Gordon, H.R. and P.A. Cook, *World abalone fisheries and aquaculture update: supply and market dynamics*. Journal of shellfish Research, 2004. **23**(4): p. 935-940.
9. Andrews, S., *FastQC: A quality control tool for high throughput sequence data*. Reference Source, 2010.
10. Bolger, A.M., M. Lohse, and B. Usadel, *Trimmomatic: a flexible trimmer for Illumina sequence data*. Bioinformatics, 2014: p. btu170.
11. O'Connell, J., et al., *NxTrim: optimized trimming of Illumina mate pair reads*. Bioinformatics, 2015. **31**(12): p. 2035-2037.
12. Marçais, G. and C. Kingsford, *A fast, lock-free approach for efficient parallel counting of occurrences of k-mers*. Bioinformatics, 2011. **27**(6): p. 764-770.
13. Boetzer, M., et al., *Scaffolding pre-assembled contigs using SSPACE*. Bioinformatics, 2011. **27**(4): p. 578-579.
14. English, A.C., et al., *Mind the gap: upgrading genomes with Pacific Biosciences RS long-read sequencing technology*. PloS one, 2012. **7**(11): p. e47768.
15. Luo, R., et al., *SOAPdenovo2: an empirically improved memory-efficient short-read de novo assembler*. GigaScience, 2012. **1**(1): p. 1-6.
16. Tarailo-Graovac, M. and N. Chen, *Using RepeatMasker to identify repetitive elements in genomic sequences*. Current Protocols in Bioinformatics, 2009: p. 4.10. 1-4.10. 14.
17. Jurka, J., et al., *Repbase Update, a database of eukaryotic repetitive elements*. Cytogenetic and genome research, 2005. **110**(1-4): p. 462-467.
18. Bao, Z. and S.R. Eddy, *Automated de novo identification of repeat sequence families in sequenced genomes*. Genome Research, 2002. **12**(8): p. 1269-1276.

- 1 19. Price, A.L., N.C. Jones, and P.A. Pevzner, *De novo identification of repeat families in large*  
2 *genomes*. Bioinformatics, 2005. **21**(suppl 1): p. i351-i358.
- 3
- 4 20. Benson, G., *Tandem repeats finder: a program to analyze DNA sequences*. Nucleic acids  
5 research, 1999. **27**(2): p. 573.
- 6
- 7 21. Trapnell, C., L. Pachter, and S.L. Salzberg, *TopHat: discovering splice junctions with RNA-*  
8 *Seq*. Bioinformatics, 2009. **25**(9): p. 1105-1111.
- 9
- 10 22. Trapnell, C., et al., *Differential gene and transcript expression analysis of RNA-seq*  
11 *experiments with TopHat and Cufflinks*. Nature protocols, 2012. **7**(3): p. 562-578.
- 12
- 13 23. Altschul, S.F., et al., *Gapped BLAST and PSI-BLAST: a new generation of protein database*  
14 *search programs*. Nucleic acids research, 1997. **25**(17): p. 3389-3402.
- 15
- 16 24. Slater, G.S. and E. Birney, *Automated generation of heuristics for biological sequence*  
17 *comparison*. BMC bioinformatics, 2005. **6**(1): p. 31.
- 18
- 19 25. Stanke, M., et al., *Using native and syntenically mapped cDNA alignments to improve de*  
20 *novo gene finding*. Bioinformatics, 2008. **24**(5): p. 637-644.
- 21
- 22 26. Solovyev, V., et al., *Automatic annotation of eukaryotic genes, pseudogenes and promoters*.  
23 *Genome Biol*, 2006. **7**(Suppl 1): p. S10.
- 24
- 25 27. Blanco, E., G. Parra, and R. Guigó, *Using geneid to identify genes*. Current protocols in  
26 bioinformatics, 2007: p. 4.3. 1-4.3. 28.
- 27
- 28 28. Haas, B.J., et al., *Automated eukaryotic gene structure annotation using EVIDENCEModeler*  
29 *and the Program to Assemble Spliced Alignments*. Genome biology, 2008. **9**(1): p. R7.
- 30
- 31
- 32
- 33
- 34
- 35
- 36
- 37
- 38
- 39
- 40
- 41
- 42
- 43
- 44
- 45
- 46
- 47
- 48
- 49
- 50
- 51
- 52
- 53
- 54
- 55
- 56
- 57
- 58
- 59
- 60
- 61
- 62
- 63
- 64
- 65

16  
17  
18  
19  
20  
21  
22  
23  
24  
25  
26  
27  
28  
29  
30  
31  
32  
33  
34  
35  
36  
37  
38  
39  
40  
41  
42  
43  
44  
45  
46  
47  
48  
49  
50  
51  
52  
53  
54  
55  
56  
57  
58  
59  
60  
61  
62  
63  
64  
65

## Tables

Table 1. Summary statistics of generated whole genome shotgun sequencing data.

| Library Name | Library Type | Insert Size | Platform     | Read Length         | No. Read      | Total bp        |
|--------------|--------------|-------------|--------------|---------------------|---------------|-----------------|
| 250bp        | Paired-end   | 250         | Nextseq500   | 150                 | 876,529,480   | 131,440,418,087 |
| 350bp        | Paired-end   | 350         | Hiseq2000    | 101                 | 1,413,620,786 | 142,775,699,386 |
| 3k           | Mate-pair    | 3,000       | Nextseq500   | 150                 | 580,064,464   | 85,689,154,056  |
| 5k           | Mate-pair    | 5,000       | Nextseq500   | 150                 | 468,432,888   | 69,966,139,205  |
| 8k           | Mate-pair    | 8,000       | Nextseq500   | 150                 | 335,132,792   | 50,109,845,012  |
| 10k          | Mate-pair    | 10,000      | Nextseq500   | 150                 | 569,376,096   | 85,080,237,236  |
| 20k          | P6-C4        | 20,000      | Pacbio RS II | 10,094<br>(average) | 1,573,020     | 15,879,626,978  |
| <b>Total</b> |              |             |              |                     |               | 580,941,119,960 |

1 Table 2. Summary statistics for the *Haliotis discus hannai* draft genome (>2kb).  
2  
3

---

4 **Assembled Genome**

---

|    |                                  |                   |
|----|----------------------------------|-------------------|
| 5  |                                  |                   |
| 6  | Size(1n)                         | 1.80 Gb           |
| 7  |                                  |                   |
| 8  | GC level                         | 40.51%            |
| 9  |                                  |                   |
| 10 | No. scaffolds                    | 35,450            |
| 11 |                                  |                   |
| 12 | N50 of scaffolds (bp)            | 211,346           |
| 13 |                                  |                   |
| 14 | N bases in scaffolds (%)         | 116 Mb (6.45%)    |
| 15 |                                  |                   |
| 16 | Longest(shortest) scaffolds (bp) | 2,207,537 (2,000) |
| 17 |                                  |                   |
| 18 | Average scaffold Length (bp)     | 50,870.65         |
| 19 |                                  |                   |

---

20  
21  
22  
23  
24  
25  
26  
27  
28  
29  
30  
31  
32  
33  
34  
35  
36  
37  
38  
39  
40  
41  
42  
43  
44  
45  
46  
47  
48  
49  
50  
51  
52  
53  
54  
55  
56  
57  
58  
59  
60  
61  
62  
63  
64  
65



1  
2  
3  
4  
5  
6  
7  
8  
9  
10  
11  
12  
13  
14  
15  
16  
17  
18  
19  
20  
21  
22  
23  
24  
25  
26  
27  
28  
29  
30  
31  
32  
33  
34  
35  
36  
37  
38  
39  
40  
41  
42  
43  
44  
45  
46  
47  
48  
49  
50  
51  
52  
53  
54  
55  
56  
57  
58  
59  
60  
61  
62  
63  
64  
65

| <b>Repeat Element</b> | <b>No. Element</b> | <b>Length (%)</b>   |
|-----------------------|--------------------|---------------------|
| SINE                  | 284,485            | 96,155,199 (5.11%)  |
| LINE                  | 700,245            | 160,387,248 (8.53%) |
| LTR element           | 383,770            | 55,149,794 (2.93%)  |
| DNA element           | 58,022             | 14,563,432 (0.77%)  |
| Small RNA             | 20,997             | 1,537,853 (0.08%)   |
| Simple repeat         | 161,246            | 32,547,245 (1.73%)  |
| Low complexity        | 326,399            | 21,446,303 (1.14%)  |
| Unclassified          | 1,522,272          | 265,603,066 (14.1%) |

Table 3. Summary of identified repeat elements in the *Haliotis discus hannai* genome.

16  
17  
18  
19  
20  
21  
22  
23  
24  
25  
26  
27  
28  
29  
30  
31  
32  
33  
34  
35  
36  
37  
38  
39  
40  
41  
42  
43  
44  
45  
46  
47  
48  
49  
50  
51  
52  
53  
54  
55  
56  
57  
58  
59  
60  
61  
62  
63  
64  
65

Table 4. Summary statistics of generated transcriptome data for six organ tissues using Illumina platform.

| <b>Library Name</b> | <b>Library Type</b> | <b>Platform</b> | <b>Read Length</b> | <b>No. Read</b> | <b>Total bp</b> |
|---------------------|---------------------|-----------------|--------------------|-----------------|-----------------|
| Blood               | Paired-end          | Hiseq2000       | 101                | 53,525,950      | 5,406,120,950   |
| Digestive duct      | Paired-end          | Hiseq2000       | 101                | 56,485,666      | 5,705,052,266   |
| Gill                | Paired-end          | Hiseq2000       | 101                | 66,415,882      | 6,708,004,082   |
| Hepatopancreas      | Paired-end          | Hiseq2000       | 101                | 58,467,176      | 5,905,184,776   |
| Mantle              | Paired-end          | Hiseq2000       | 101                | 65,741,776      | 6,639,919,376   |
| Ovary               | Paired-end          | Hiseq2000       | 101                | 60,997,100      | 6,160,707,100   |
| Total               |                     |                 |                    |                 | 36,524,988,550  |

16  
17  
18  
19  
20  
21  
22  
23  
24  
25  
26  
27  
28  
29  
30  
31  
32  
33  
34  
35  
36  
37  
38  
39  
40  
41  
42  
43  
44  
45  
46  
47  
48  
49  
50  
51  
52  
53  
54  
55  
56  
57  
58  
59  
60  
61  
62  
63  
64  
65

| <b>Species</b> | <b>Type</b> | <b>Element</b> | <b>Total count</b> | <b>Count/<br/>Gene</b> | <b>Total length,<br/>bp</b> | <b>Mean length,<br/>Bp</b> | <b>Genome<br/>Coverage %</b> |
|----------------|-------------|----------------|--------------------|------------------------|-----------------------------|----------------------------|------------------------------|
|----------------|-------------|----------------|--------------------|------------------------|-----------------------------|----------------------------|------------------------------|

---

Table 5. Summary statistics of protein alignment using tBlastn for protein based evidence gene structure.

16  
17  
18  
19  
20  
21  
22  
23  
24  
25  
26  
27  
28  
29  
30  
31  
32  
33  
34  
35  
36  
37  
38  
39  
40  
41  
42  
43  
44  
45  
46  
47  
48  
49  
50  
51  
52  
53  
54  
55  
56  
57  
58  
59  
60  
61  
62  
63  
64  
65

|                                      |          |            |         |      |             |          |       |
|--------------------------------------|----------|------------|---------|------|-------------|----------|-------|
| <i>Homo sapiens</i>                  | Protein  | Transcript | 18,792  |      | 109,068,639 | 5,803.99 | 5.80  |
|                                      | (69,002) | Exon       | 77,320  | 4.11 | 12,667,395  | 163.83   | 0.67  |
| <i>Danio rerio</i>                   | Protein  | Transcript | 11,605  |      | 68,796,463  | 5,928.17 | 3.66  |
|                                      | (42,474) | Exon       | 47,300  | 4.08 | 7,978,167   | 168.67   | 0.42  |
| <i>Oncorhynchus mykiss</i>           | Protein  | Transcript | 15,901  |      | 55,043,032  | 3,461.61 | 2.93  |
|                                      | (53,876) | Exon       | 46,040  | 2.90 | 7,567,059   | 164.36   | 0.40  |
| <i>Lottia gigantea</i>               | Protein  | Transcript | 29,345  |      | 177,851,531 | 6,060.71 | 9.47  |
|                                      | (23,851) | Exon       | 118,165 | 4.03 | 20,583,999  | 174.20   | 1.10  |
| <i>Croatea gigas</i>                 | Protein  | Transcript | 32,978  |      | 231,175,282 | 7,009.98 | 12.30 |
|                                      | (28,027) | Exon       | 140,784 | 4.27 | 23,649,828  | 167.99   | 1.26  |
| <i>Aplysia californica</i>           | Protein  | Transcript | 10,570  |      | 67,396,621  | 6,376.22 | 3.59  |
|                                      | (29,096) | Exon       | 45,737  | 4.33 | 7,797,503   | 170.49   | 0.42  |
| <i>Strongylocentrotus purpuratus</i> | Protein  | Transcript | 9,116   |      | 46,270,640  | 5,075.76 | 2.46  |
|                                      | (38,730) | Exon       | 34,572  | 3.79 | 5,627,082   | 162.76   | 0.30  |
| <i>Branchiostoma floridae</i>        | Protein  | Transcript | 27,438  |      | 125,307,206 | 4,566.92 | 6.67  |
|                                      | (58,493) | Exon       | 92,426  | 3.37 | 15,483,164  | 167.52   | 0.82  |

16  
17  
18  
19  
20  
21  
22  
23  
24  
25  
26  
27  
28  
29  
30  
31  
32  
33  
34  
35  
36  
37  
38  
39  
40  
41  
42  
43  
44  
45  
46  
47  
48  
49  
50  
51  
52  
53  
54  
55  
56  
57  
58  
59  
60  
61  
62  
63  
64  
65

Table 6. Summary statistics for ab initio gene prediction results using various programs and parameters.

| Program  | Matrix                                            | Element          | Total count | Count/Gene | Total length, bp | Mean length, bp | Genome Coverage % |       |
|----------|---------------------------------------------------|------------------|-------------|------------|------------------|-----------------|-------------------|-------|
| Augustus | Custom parameter (RNAseq)                         | Exon/transcript  | 88,825      | 3.92       | 367,066,732      | 4,132.47        | 19.54             |       |
|          |                                                   | Gene             |             |            |                  |                 |                   |       |
|          | Custom parameter ( <i>H.discus hannai</i> IsoSeq) | CDS              | 348,528     | 4.11       | 76,388,076       | 219.17          | 4.07              |       |
|          |                                                   | Gene             | 90,396      |            |                  |                 |                   |       |
|          | Custom parameter (H.discus discus IsoSeq)         | CDS              | 371,487     | 3.97       | 346,455,180      | 4,108.72        | 18.44             |       |
|          |                                                   | Gene             | 84,322      |            |                  |                 |                   |       |
|          | Custom parameter (BUSCO)                          | CDS              | 335,103     | 4.24       | 72,527,841       | 216.43          | 3.86              |       |
|          |                                                   | Gene             | 111,058     |            |                  |                 |                   |       |
|          | Custom parameter (CEGAM)                          | CDS              | 470,839     | 4.95       | 84,333,972       | 179.11          | 4.49              |       |
|          |                                                   | Gene             | 76,504      |            |                  |                 |                   |       |
|          | Custom parameter (Protein)                        | CDS              | 378,485     | 3.43       | 63,424,677       | 167.58          | 3.38              |       |
|          |                                                   | Gene             | 22,420      |            |                  |                 |                   |       |
|          | Fgenesh                                           | Custom parameter | CDS         | 76,848     | 3.46             | 1,366,924,540   | 7,426.88          | 72.75 |
|          |                                                   |                  | Gene        | 184,051    |                  |                 |                   |       |
| Geneid   | <i>Ciona intestinalis</i>                         | CDS              | 636,568     | 1.41       | 98,055,591       | 154.04          | 5.22              |       |
|          |                                                   | Gene             | 789,540     |            |                  |                 |                   |       |
|          |                                                   | CDS              | 1,112,959   |            | 436,990,370      | 553.47          | 23.26             |       |
|          |                                                   |                  |             |            | 140,976,492      | 126.67          | 7.50              |       |

Table 7. Summary statistics for the consensus gene set of *Haliotis discus hannai* genome.

15  
16  
17  
18  
19  
20  
21  
22  
23  
24  
25  
26  
27  
28  
29  
30  
31  
32  
33  
34  
35  
36  
37  
38  
39  
40  
41  
42  
43  
44  
45  
46  
47  
48  
49  
50  
51  
52  
53  
54  
55  
56  
57  
58  
59  
60  
61  
62  
63  
64  
65

---

|        |        |      |       |            |       |
|--------|--------|------|-------|------------|-------|
| Gene   | 29,449 | -    | 2,705 | 79,661,536 | 4.2 % |
| <hr/>  |        |      |       |            |       |
| Exon   | 74,745 | 2.54 | 280   | 20,985,298 | 1.1 % |
| <hr/>  |        |      |       |            |       |
| Intron | 45,296 | 1.54 | 1,295 | 58,676,238 | 3.1 % |

---

16  
17  
18  
19  
20  
21  
22  
23  
24  
25  
26  
27  
28  
29  
30  
31  
32  
33  
34  
35  
36  
37  
38  
39  
40  
41  
42  
43  
44  
45  
46  
47  
48  
49  
50  
51  
52  
53  
54  
55  
56  
57  
58  
59  
60  
61  
62  
63  
64  
65

Table 8. Summary statistics of Benchmarking Universal Single-Copy Orthologs (BUSCO) analysis for *Haliotis discus hannai* genome based

---

| <b>Categories</b>           | <b>#Genes</b> | <b>Percentage</b> |
|-----------------------------|---------------|-------------------|
| Complete Single-Copy BUSCOs | 609           | 72.2%             |
| Complete Duplicate BUSCOs   | 48            | 5.7%              |
| Fragmented BUSCOs           | 130           | 15.4%             |

---

on Metazoans DB.

15  
16  
17  
18  
19  
20  
21  
22  
23  
24  
25  
26  
27  
28  
29  
30  
31  
32  
33  
34  
35  
36  
37  
38  
39  
40  
41  
42  
43  
44  
45  
46  
47  
48  
49  
50  
51  
52  
53  
54  
55  
56  
57  
58  
59  
60  
61  
62  
63  
64  
65

Missing BUSCOs

104

12.3%

---



# Figures

Figure 1. 19-mer distribution of using jellyfish with 350bp paired-end whole genome sequencing data.

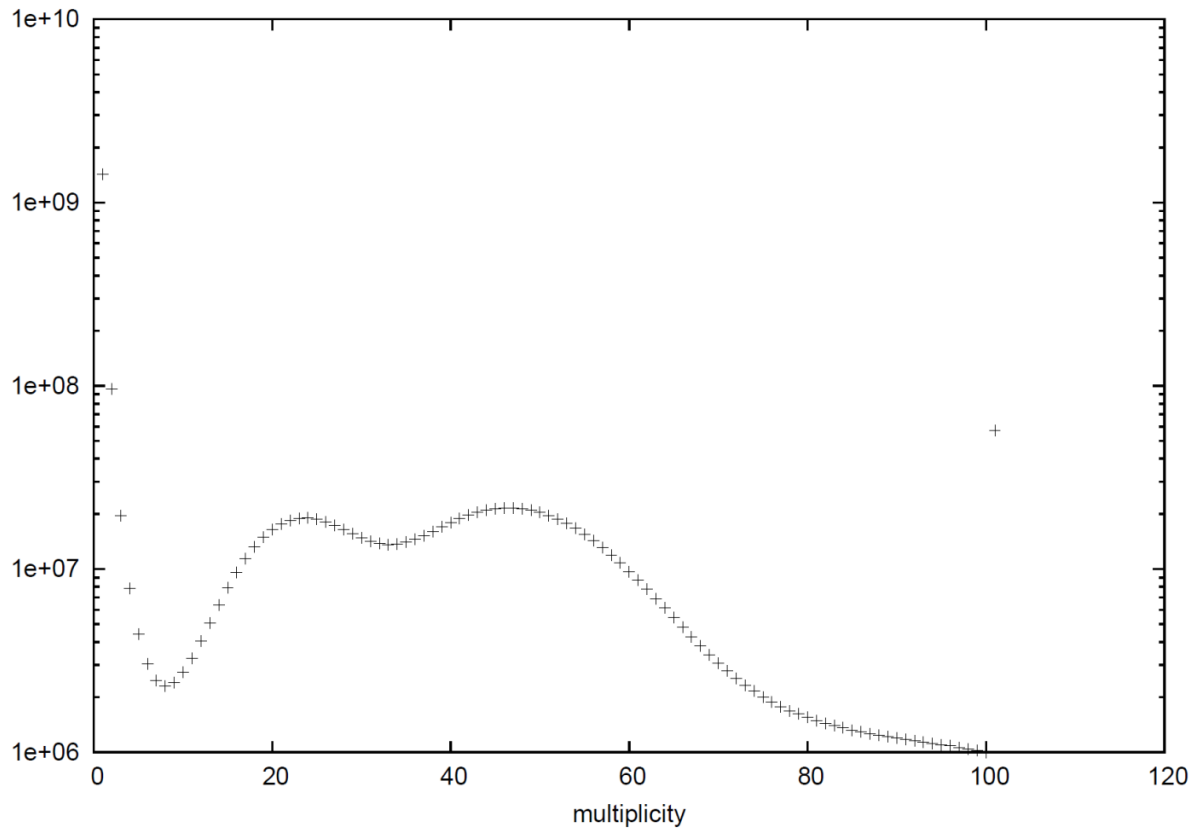

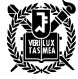

# SEOUL NATIONAL UNIVERSITY

Laboratory of Bioinformatics and Population Genetics

Heebal Kim, Ph.D.  
Professor

---

November, 21, 2016

Editor in Chief, *GIGA SCIENCE*

Dear. Editor

We are pleased to submit our manuscript entitled “Genome sequence of pacific abalone (*Haliotis discus hannai*): the first draft genome in family Haliotidae.” by Nam et al, for publication as a data note in *GIGA SCIENCE*.

While many genome studies were successfully conducted for various species, no genomics information is available for abalone which is evolutionary and ecologically important marine animal. To solve the limitation of previous studies, we conducted the large-scale genome analysis for the abalone and constructed draft genome with annotation. This is the first Haliotidae genome ever analyzed and this will be useful resources for related researchers. In addition, we expect our data to be a valuable resource for comparative genomic studies because only few genomic information is available for marine mollusks in current genome project process. Therefore, we hope that editor in chief positively consider our manuscript.

The manuscript attached has been seen and approved by all author contributors. Feel free to get in touch with me if you have any questions.

Yours sincerely,

A handwritten signature in purple ink, appearing to be 'H. Kim'.

Heebal Kim on behalf of all the authors

Laboratory of Bioinformatics and Population Genetics, Department of Agricultural Biotechnology, Seoul National University, San 56-1, Sillim-dong, Gwanak-gu, Seoul 151-742, Korea  
Phone: 82-2-880-4803, Fax: 82-2-883-8812, Email: [heebal@snu.ac.kr](mailto:heebal@snu.ac.kr)
