# Supplementary material for: Genome sequence of pacific abalone (Haliotis discus hannai): the first draft genome in family Haliotidae
Source: PubMed Central journal article supplement (PMC5439488; doi:10.1093/gigascience/gix014), 2017-03-07
Supplement: gix014_Response_to_reviewer_comments_Original_Manuscript.pdf [file gix014_Response_to_reviewer_comments_Original_Manuscript.pdf]

We attached "Respond to Reviewer document" seperately for respsonse.
