# Supplementary material for: Genome sequence of pacific abalone (Haliotis discus hannai): the first draft genome in family Haliotidae
Source: PubMed Central journal article supplement (PMC5439488; doi:10.1093/gigascience/gix014), 2017-03-07
Supplement: gix014_Reviewer_1_Report_(Oiriginal_Submission).pdf [file gix014_Reviewer_1_Report_%28Oiriginal_Submission%29.pdf]

## Reviewer Report

**Title:** "Genome sequence of pacific abalone (*Haliotis discus hannai*): the first draft genome in family Haliotidae."

**Version:** Original Submission    **Date:** 1/9/2017

**Reviewer name:** Andrew Severin

### Reviewer Comments to Author:

Please check table on page 21 to make sure there is not a page break dividing the header from the table.

NCBI has the PRJNA317403 project ID but I did not find all the PE MP and PacBio data. Please make sure this is released upon publication.

On page 10 line 54 there is an f between employed and to

I found no issues with the methods for the assembly and annotation.

Super excited to see abalone genome assemblies coming out. Great work. Consider making a Chicago Library (Dovetail) to improve the assembly for Version 2.

### Level of Interest

Please indicate how interesting you found the manuscript: An article of importance in its field

### Quality of Written English

Please indicate the quality of language in the manuscript: Acceptable

### Declaration of Competing Interests

Please complete a declaration of competing interests, considering the following questions:

- Have you in the past five years received reimbursements, fees, funding, or salary from an organisation that may in any way gain or lose financially from the publication of this manuscript, either now or in the future?
- Do you hold any stocks or shares in an organisation that may in any way gain or lose financially from the publication of this manuscript, either now or in the future?
- Do you hold or are you currently applying for any patents relating to the content of the manuscript?
- Have you received reimbursements, fees, funding, or salary from an organization that holds or has applied for patents relating to the content of the manuscript?

- Do you have any other financial competing interests?
- Do you have any non-financial competing interests in relation to this paper?

If you can answer no to all of the above, write 'I declare that I have no competing interests' below. If your reply is yes to any, please give details below.

I am currently working on the red abalone genome.

I agree to the open peer review policy of the journal. I understand that my name will be included on my report to the authors and, if the manuscript is accepted for publication, my named report including any attachments I upload will be posted on the website along with the authors' responses. I agree for my report to be made available under an Open Access Creative Commons CC-BY license (<http://creativecommons.org/licenses/by/4.0/>). I understand that any comments which I do not wish to be included in my named report can be included as confidential comments to the editors, which will not be published.

I agree to the open peer review policy of the journal
